# Supplementary material for: From betaines to anionic N-heterocyclic carbenes. Borane, gold, rhodium, and nickel complexes starting from an imidazoliumphenolate and its carbene tautomer
Source: publisher site journal article supplement (doi:10.3762/bjoc.12.264), 2016-12-08
Supplement: Additional file 1 [file 1860-5397-12-264-S1.pdf]

# Supporting Information

for

## **From betaines to anionic N-heterocyclic carbenes. Borane, gold, rhodium, and nickel complexes starting from an imidazoliumphenolate and its carbene tautomer**

Ming Liu<sup>1</sup>, Jan C. Namyslo<sup>1</sup>, Martin Nieger<sup>2</sup>, Mika Polamo<sup>2</sup> and Andreas Schmidt<sup>\*1</sup>

Address: <sup>1</sup>Clausthal University of Technology, Institute of Organic Chemistry, Leibnizstrasse 6, D-38678 Clausthal-Zellerfeld, Germany and <sup>2</sup>University of Helsinki, Department of Chemistry, P.O. Box 55, FIN-00014 Helsinki, Finland

Email: Andreas Schmidt - schmidt@ioc.tu-clausthal.de

\*Corresponding author

### **NMR spectra and molecular drawings**

**Lithium 2-(3-butyl-1*H*-imidazol-2-ylidene-1-yl)phenolate (7)**

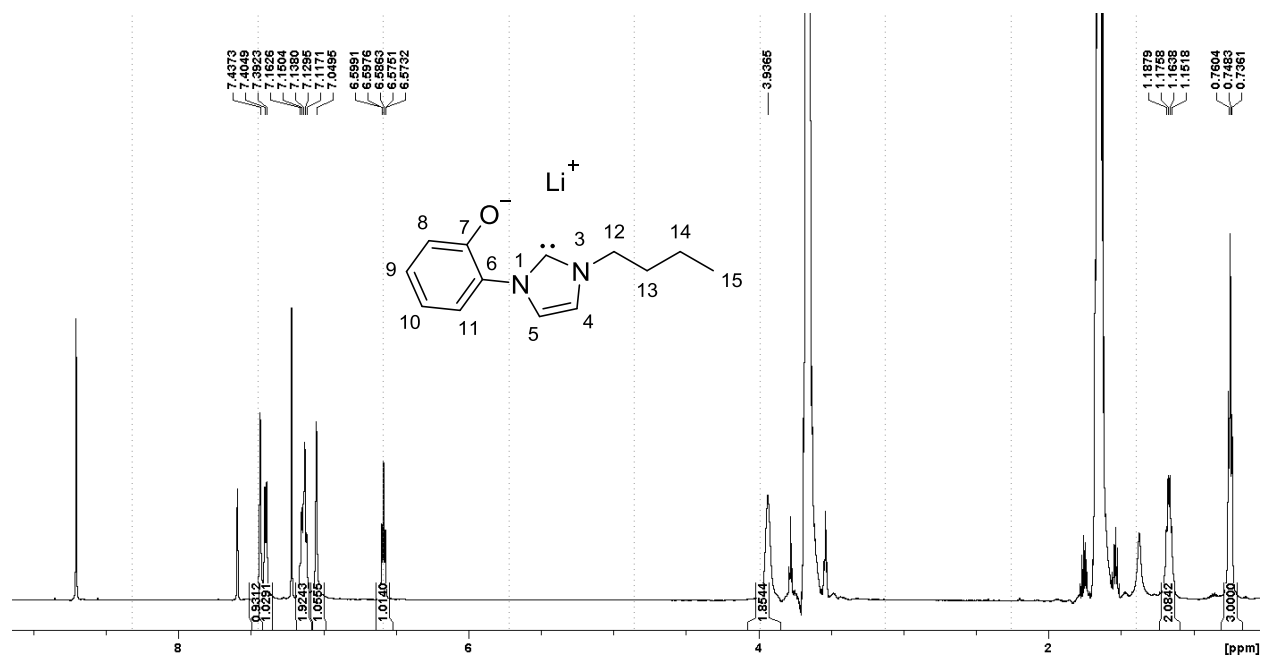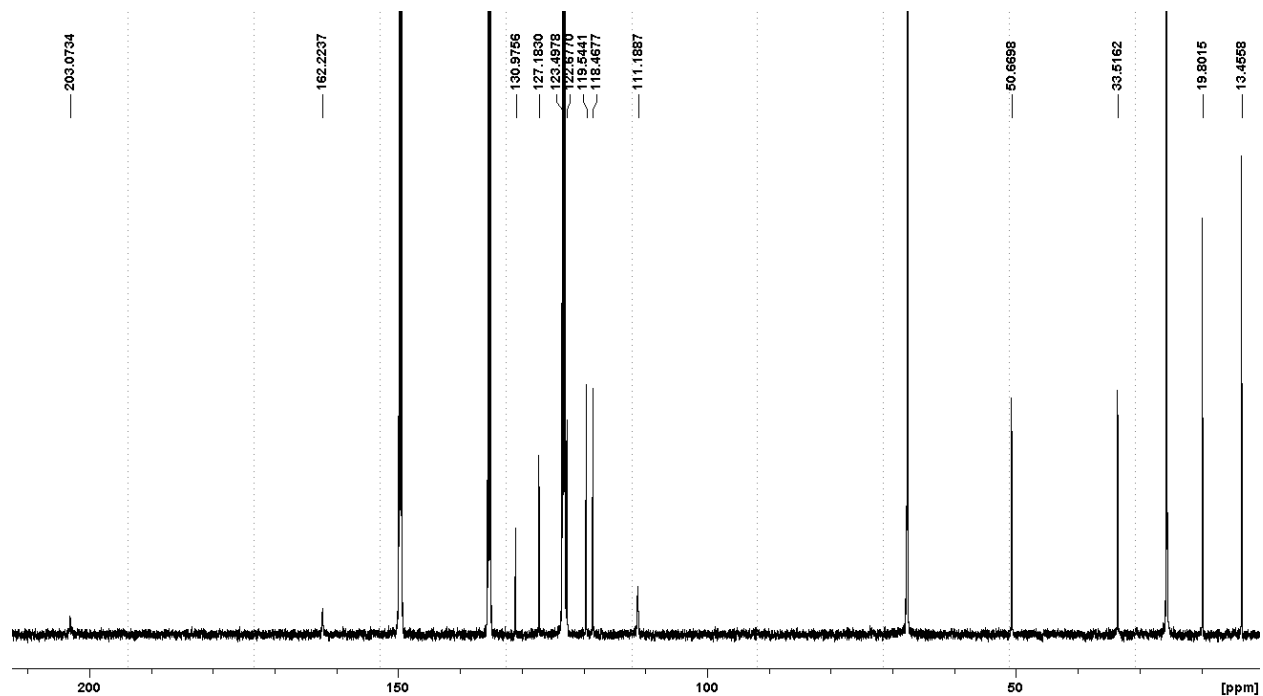

**Figures S1/2:** <sup>1</sup>H and <sup>13</sup>C NMR spectra of the lithium salt of the anionic NHC 7.

**(2-(3-Butyl-1*H*-imidazolium-1-yl)phenoxy)tris(perfluorophenyl)borate (8)**

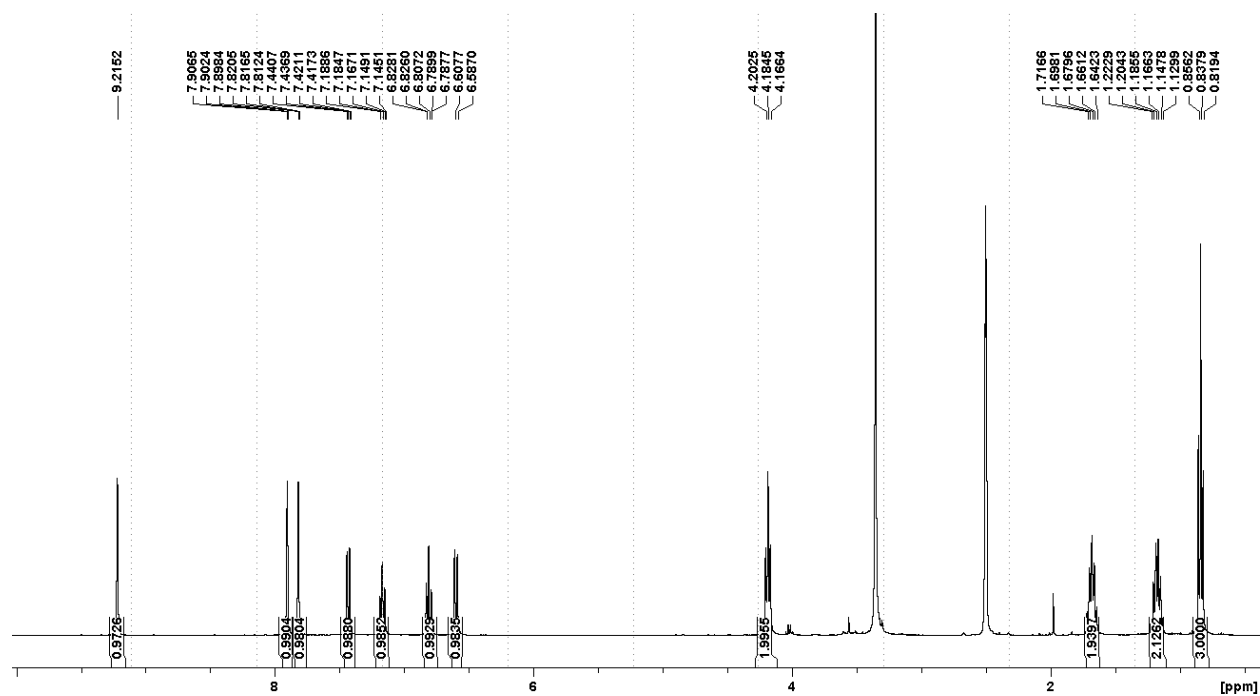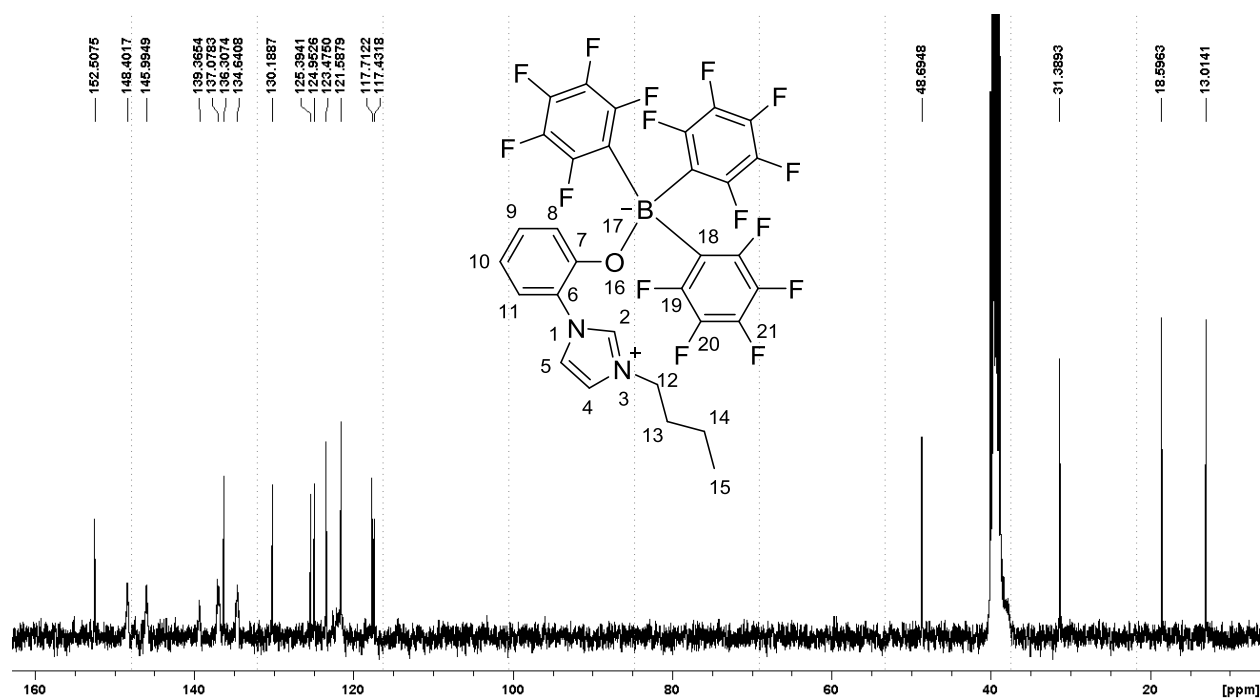

**Figures S3/4:** <sup>1</sup>H and <sup>13</sup>C NMR spectra of borane adduct **8**.

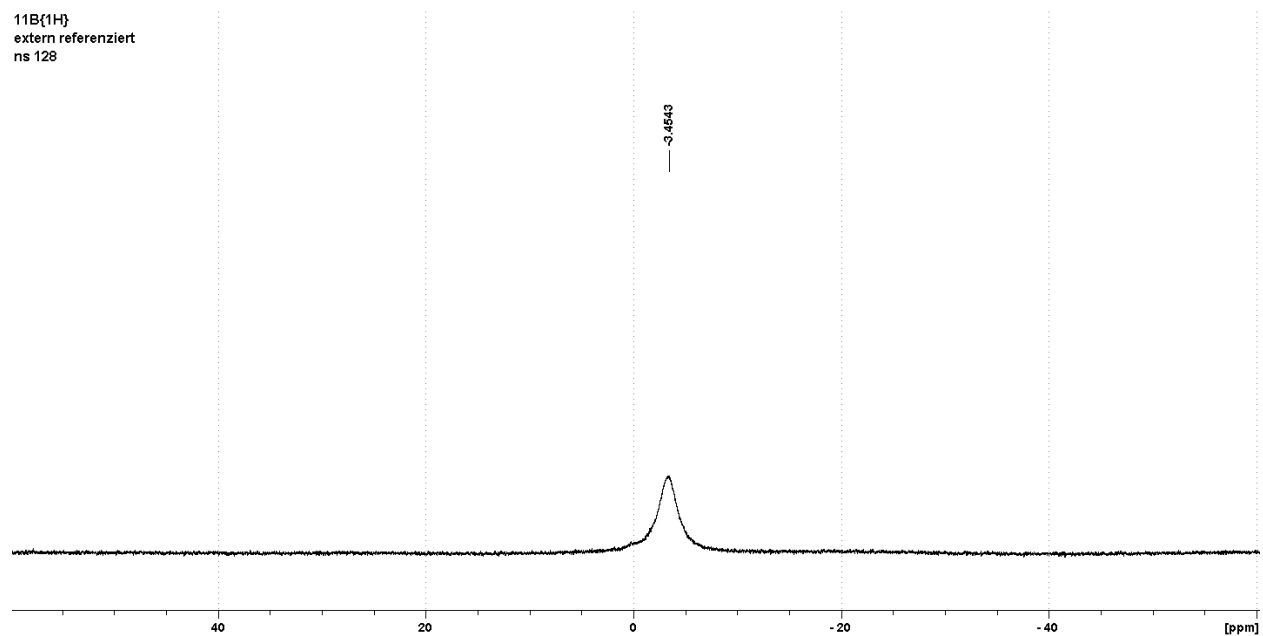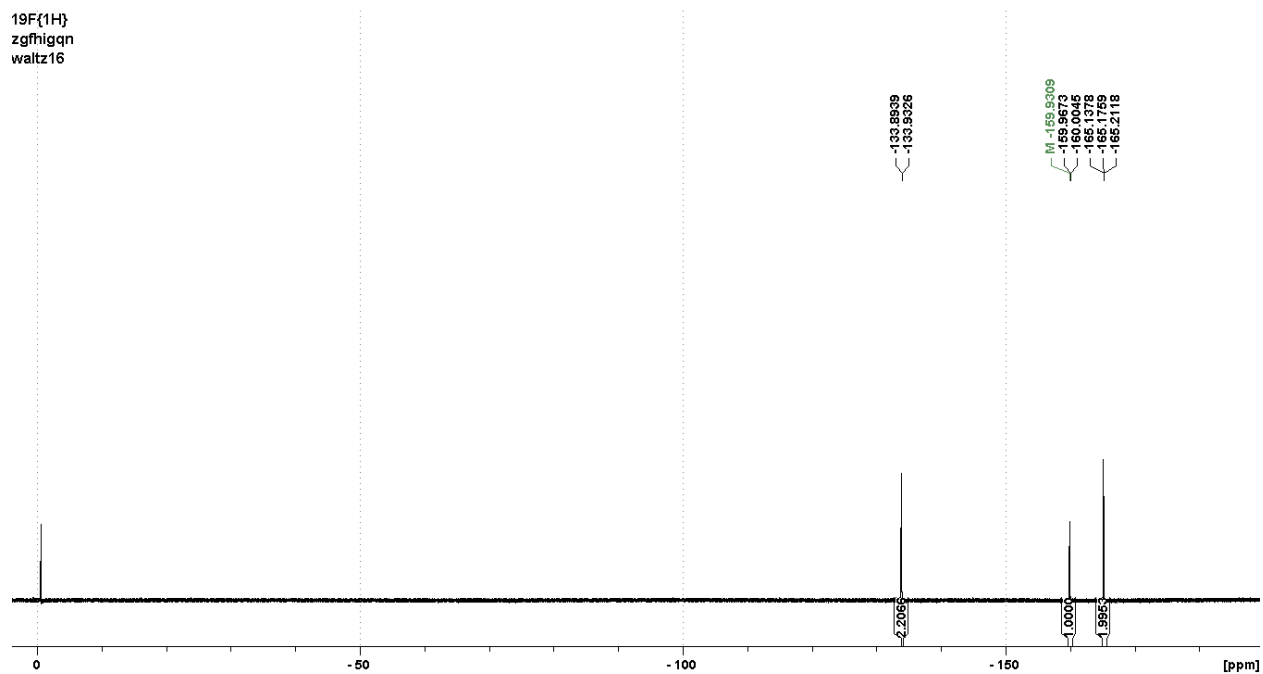

**Figures S5/6:** <sup>11</sup>B and <sup>19</sup>F NMR spectra of borane adduct **8**.

**Bis(3-butyl-1-(2-hydroxyphenyl)-1*H*-imidazolium-2-yl)gold monochloride (9)**

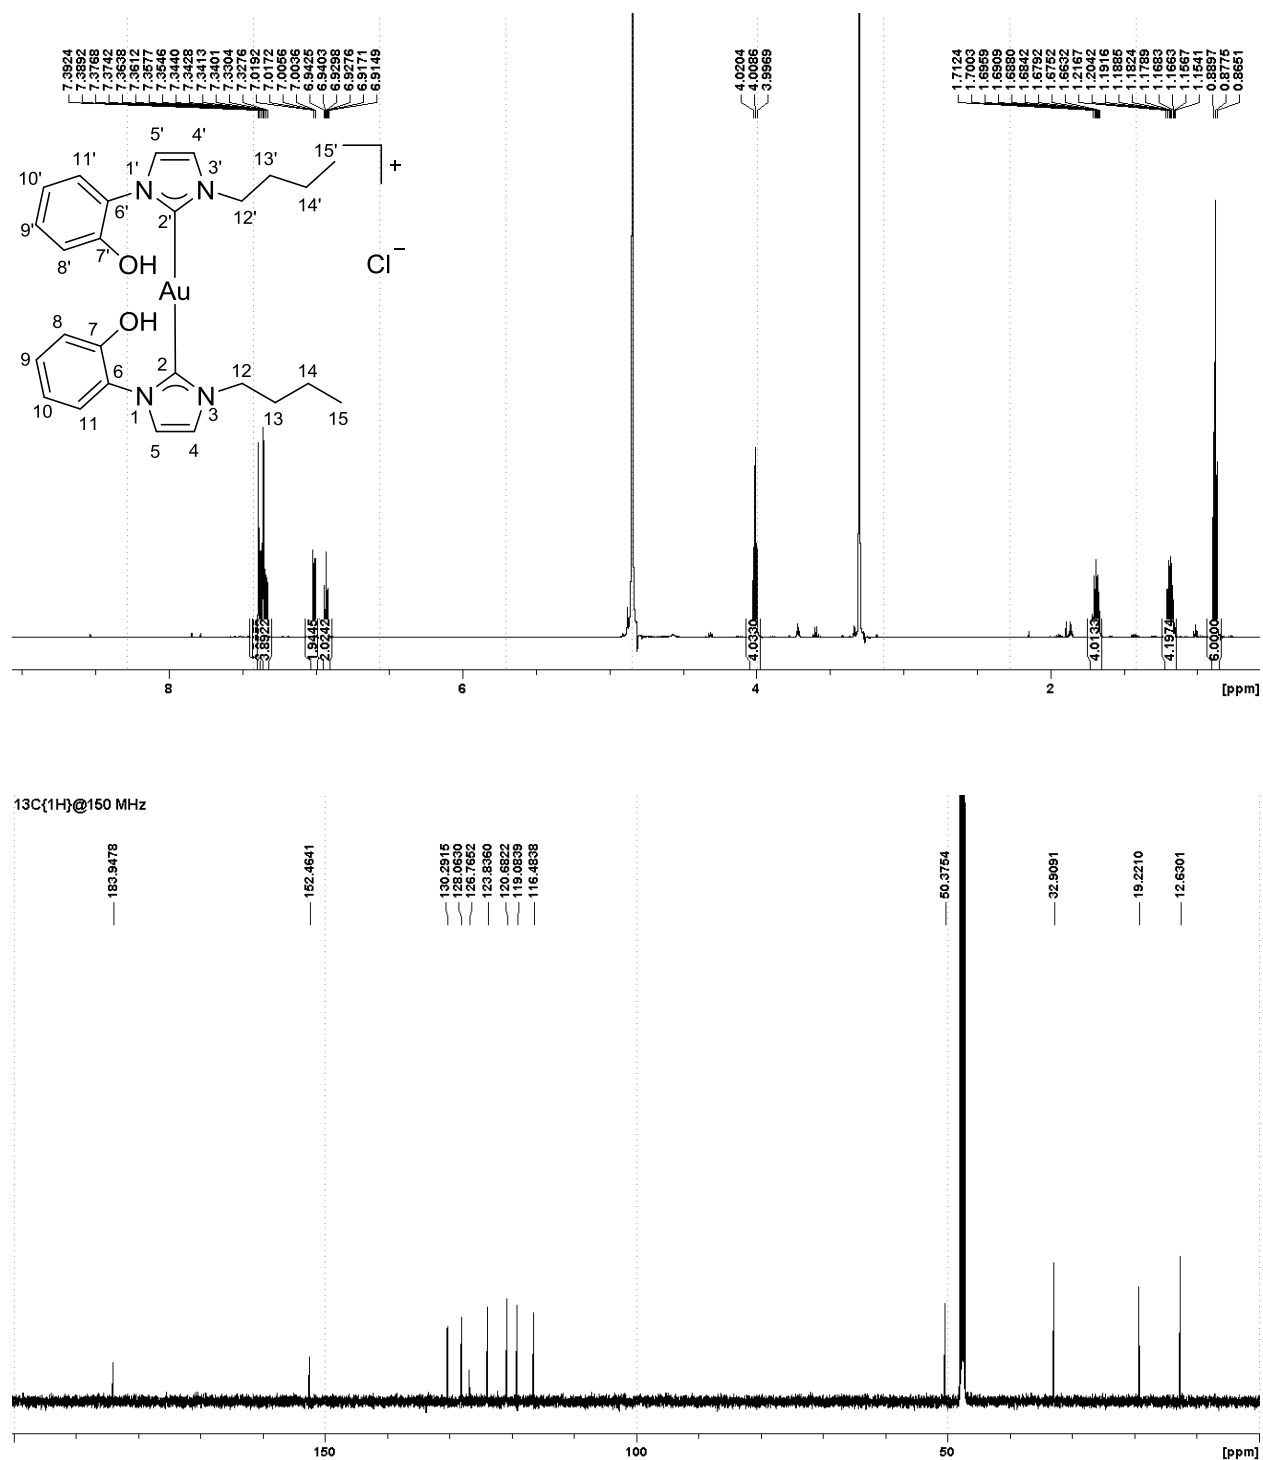

**Figures S7/8:** <sup>1</sup>H and <sup>13</sup>C NMR spectra of gold complex 9.

**Potassium bis(3-butyl-1-(2-phenolate)-1*H*-imidazolium-2-yl)gold (10)**

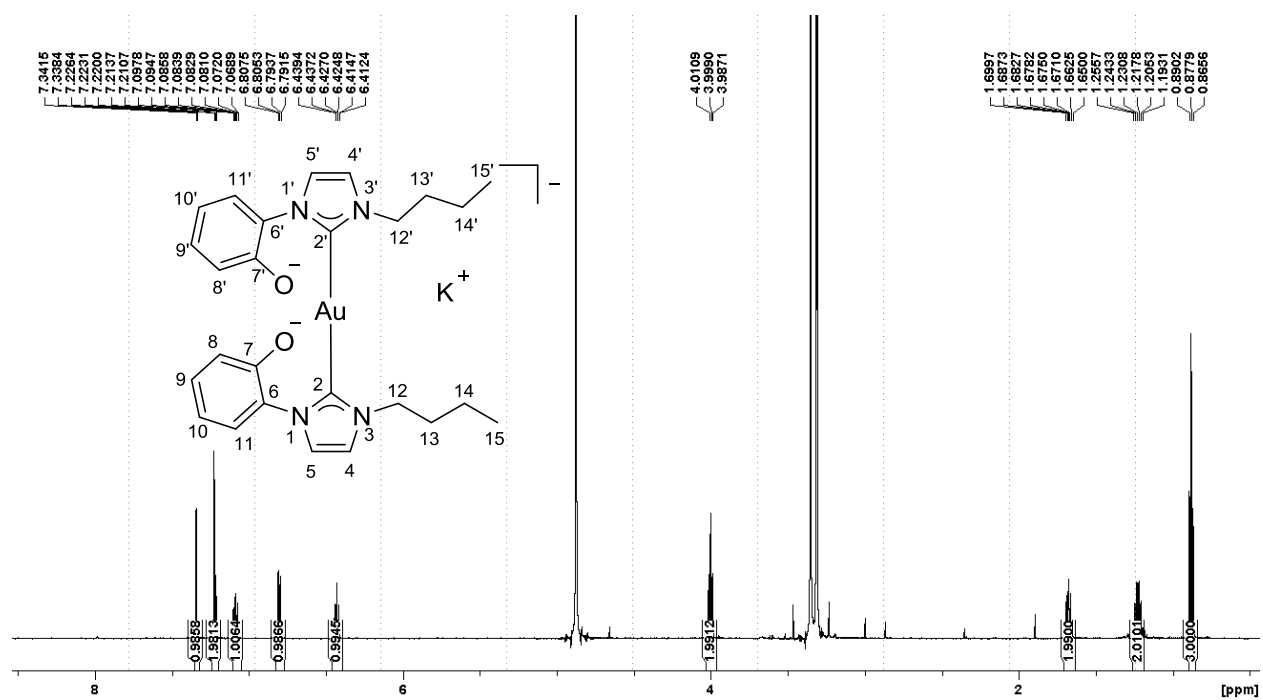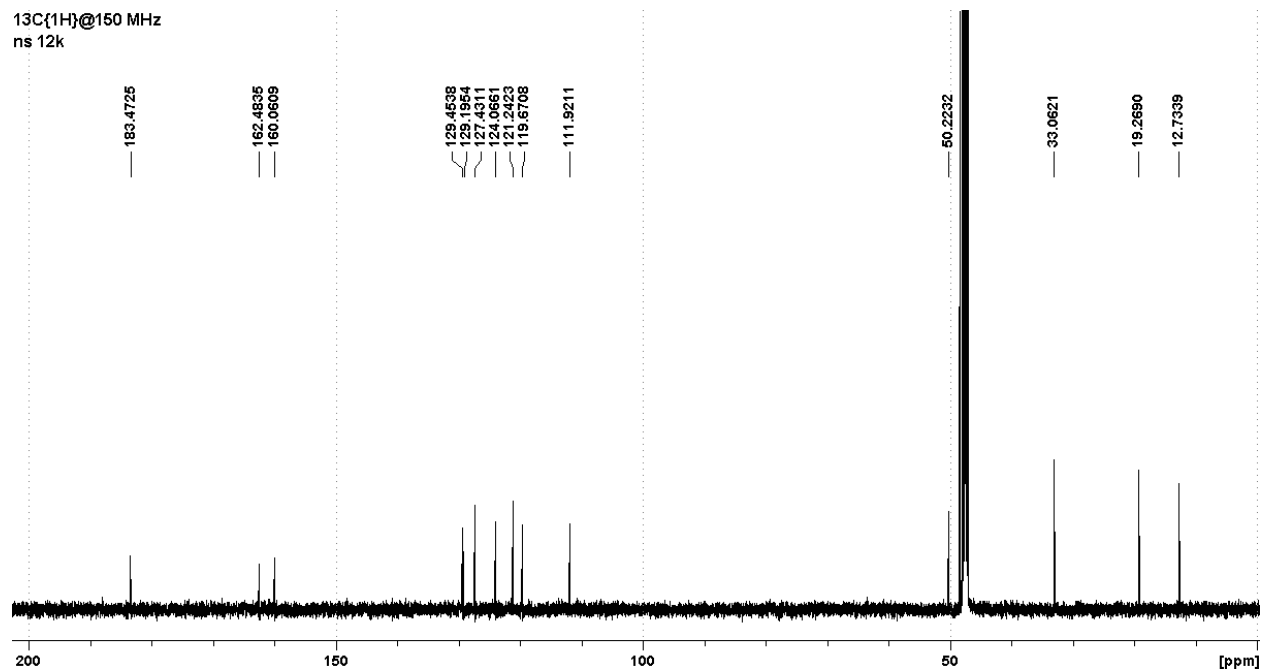

**Figures S9/10:** <sup>1</sup>H and <sup>13</sup>C NMR spectra of the anionic gold complex **10**.

**Tris(3-butyl-1-(2-oxidophenyl)-1*H*-imidazolium-2-yl)rhodium (11)**

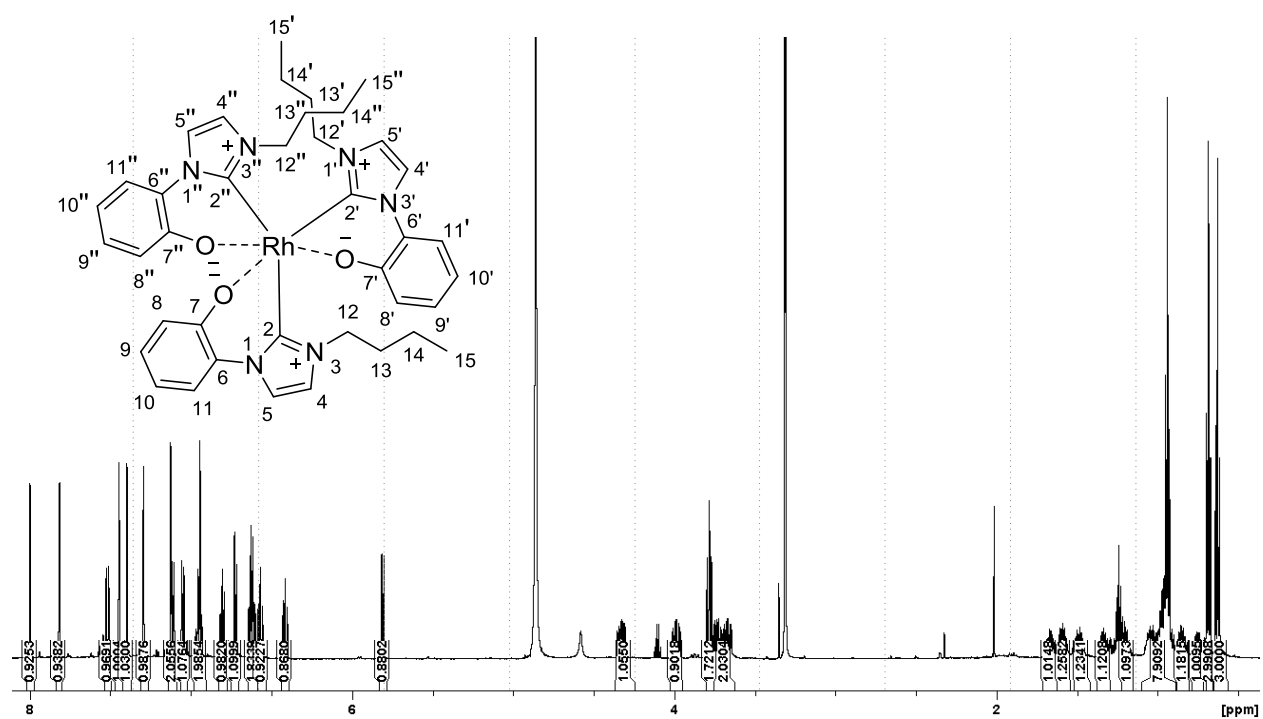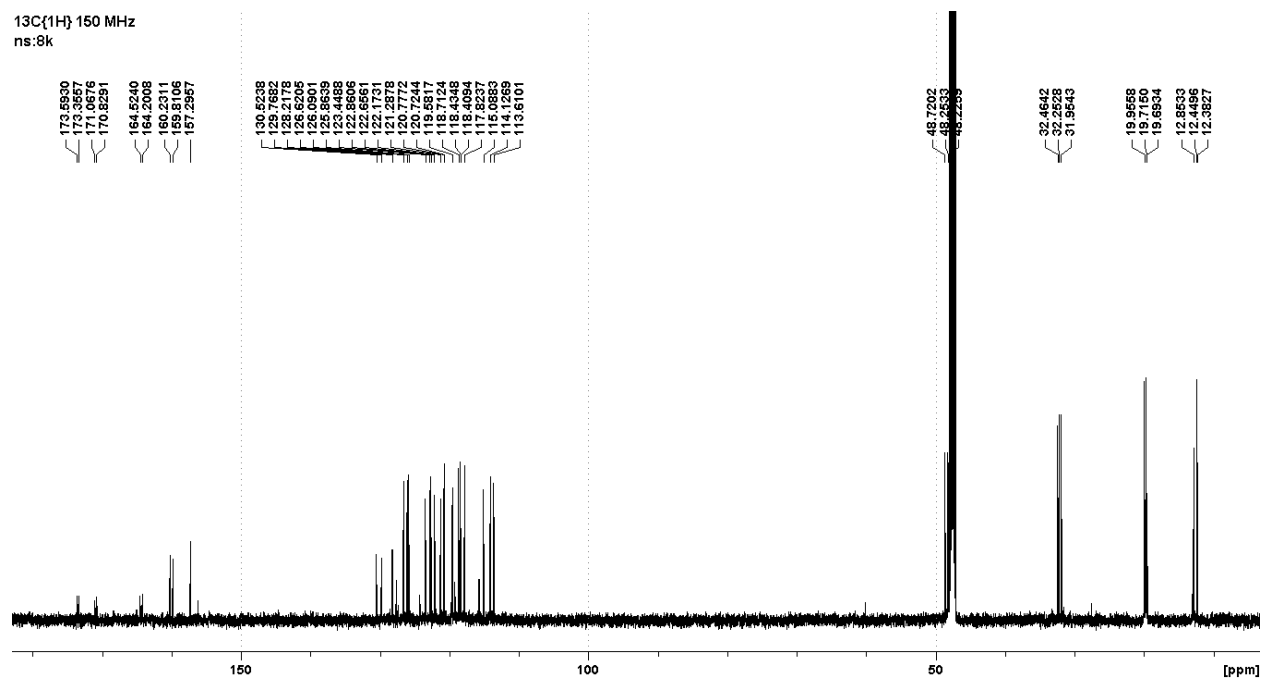

**Figures S11/12:** <sup>1</sup>H and <sup>13</sup>C NMR spectra of rhodium complex 11.

**Bis(3-butyl-1-(2-oxidophenyl)-1H-imidazolium-2-yl)nickel (12)**

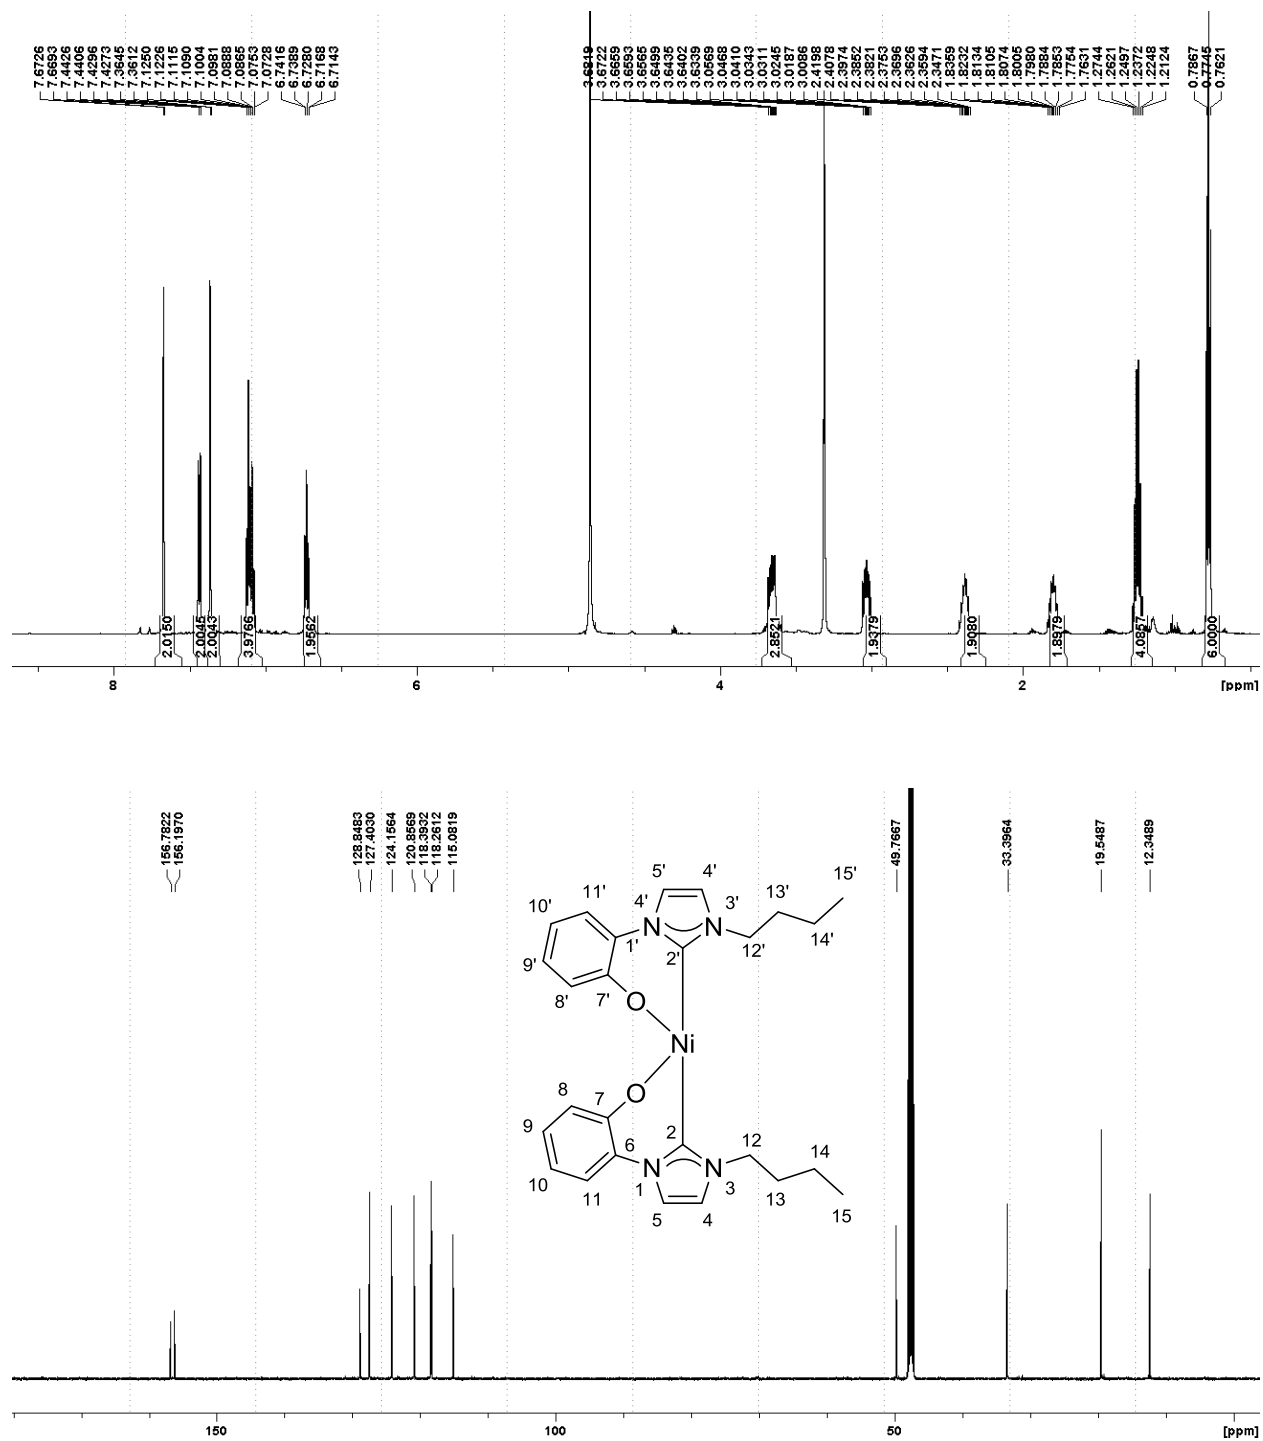

**Figures S13/14:** <sup>1</sup>H and <sup>13</sup>C NMR spectra of nickel complex 12.



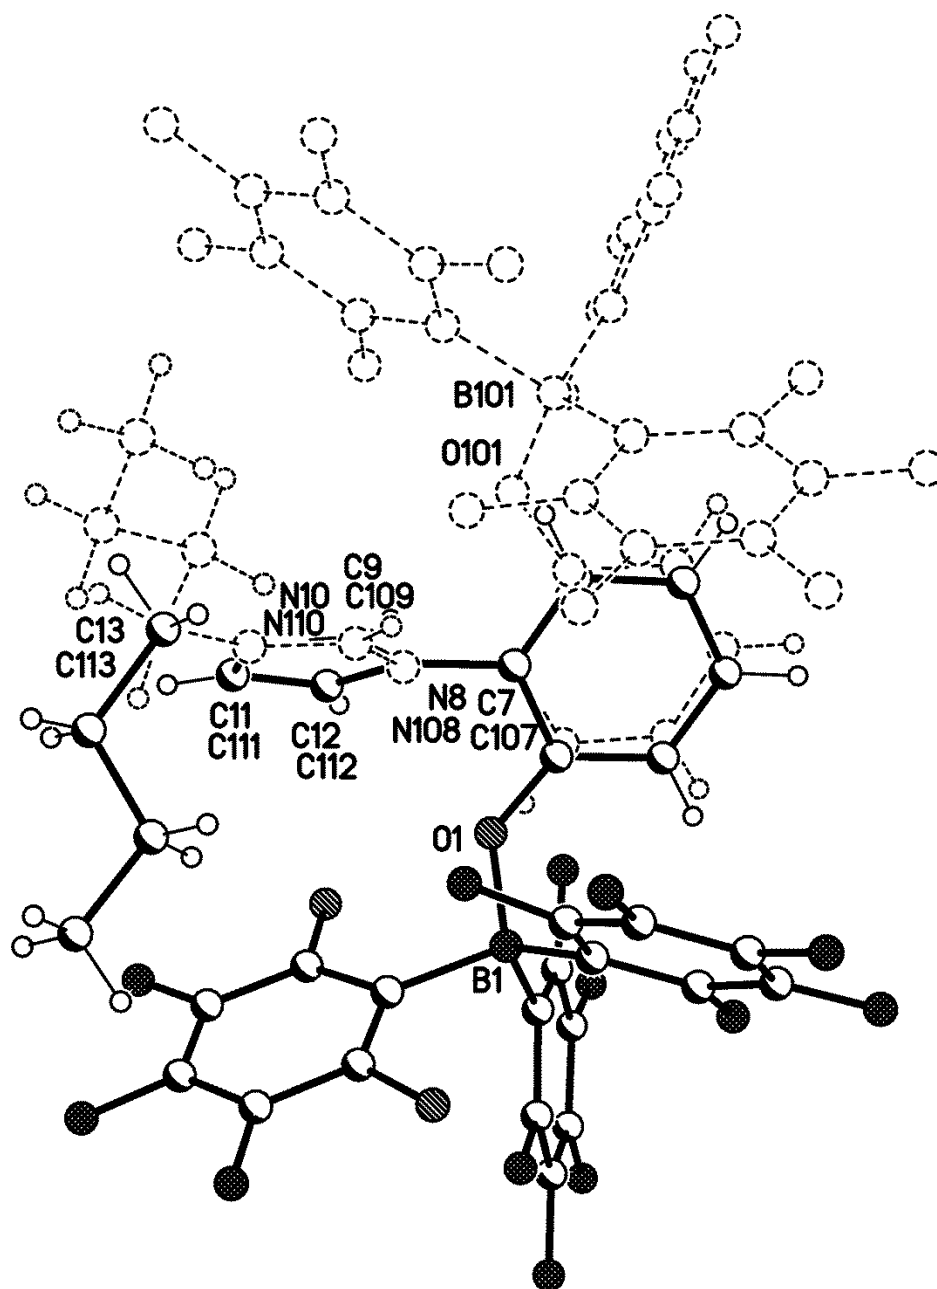

**Figure S15:** Fit of the two independent molecules of borane adduct **8**

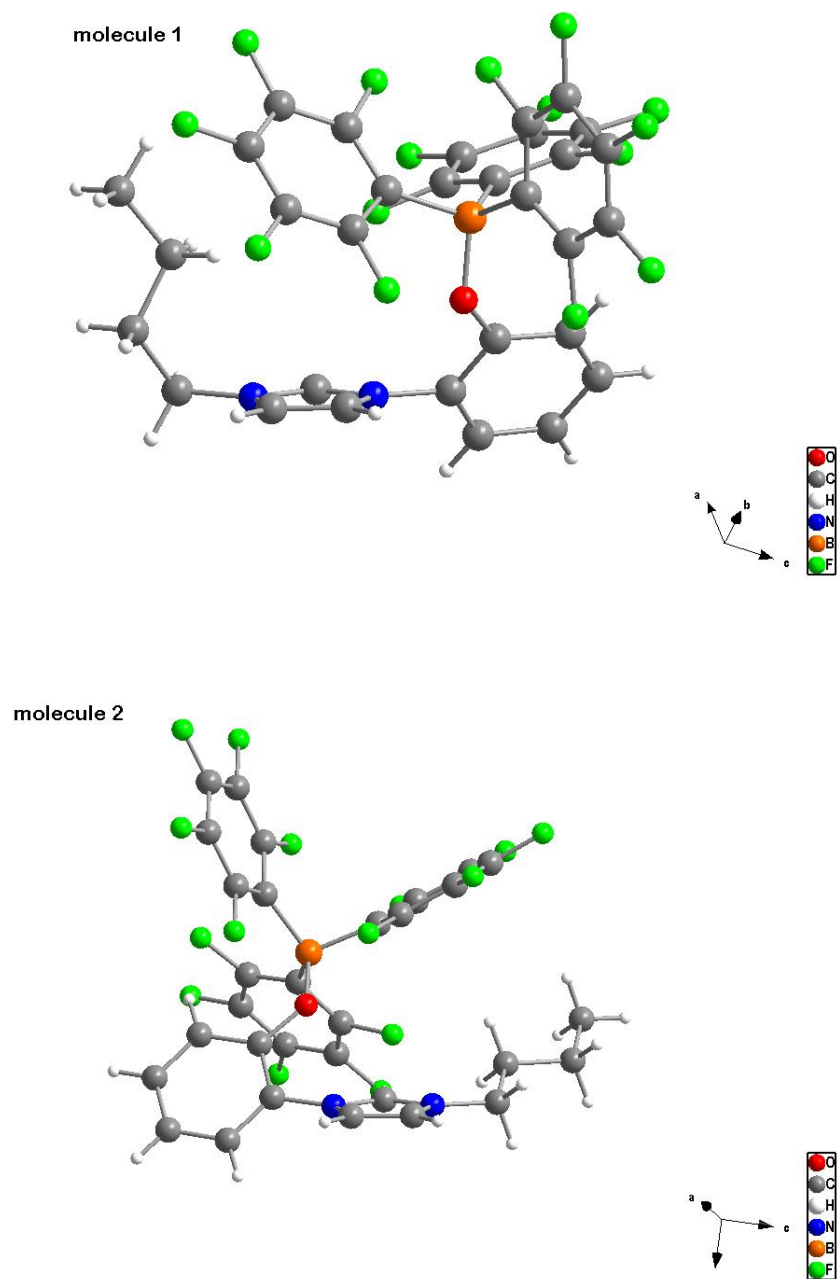

**Figure S16:** Drawing of the two independent molecules of borane adduct **8**.

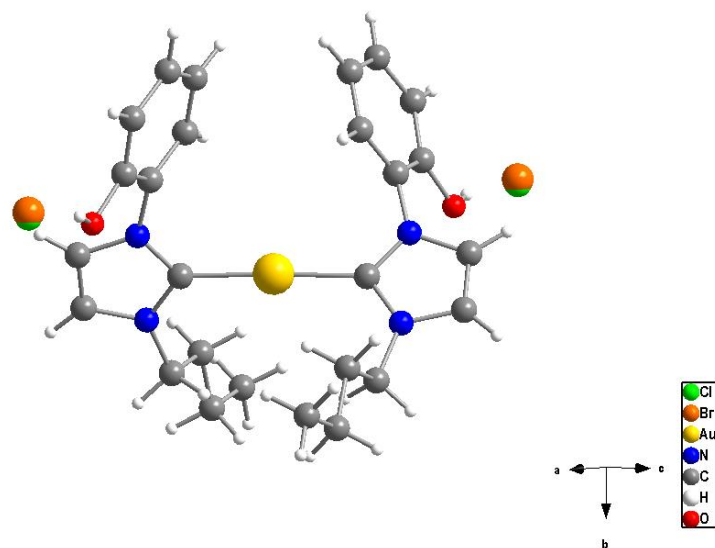

**Figure S17:** Molecular drawing of gold complex **9**, with disorder of the anion.

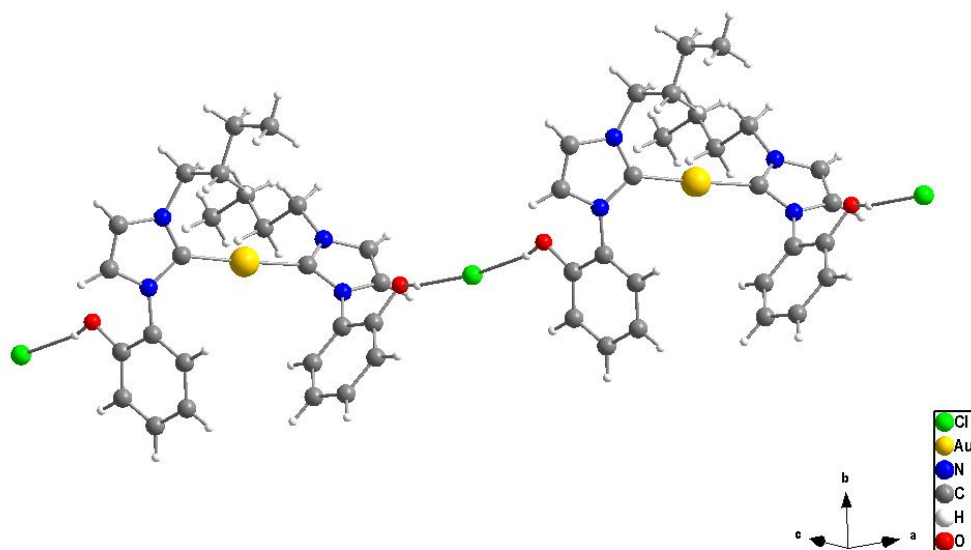

**Figure S18:** Molecular drawing of the dimer of the coordination polymer of the gold complex **9**; two complexes of **9** are bridged by two hydrogen bonds via the halogen (chloride) counterion.

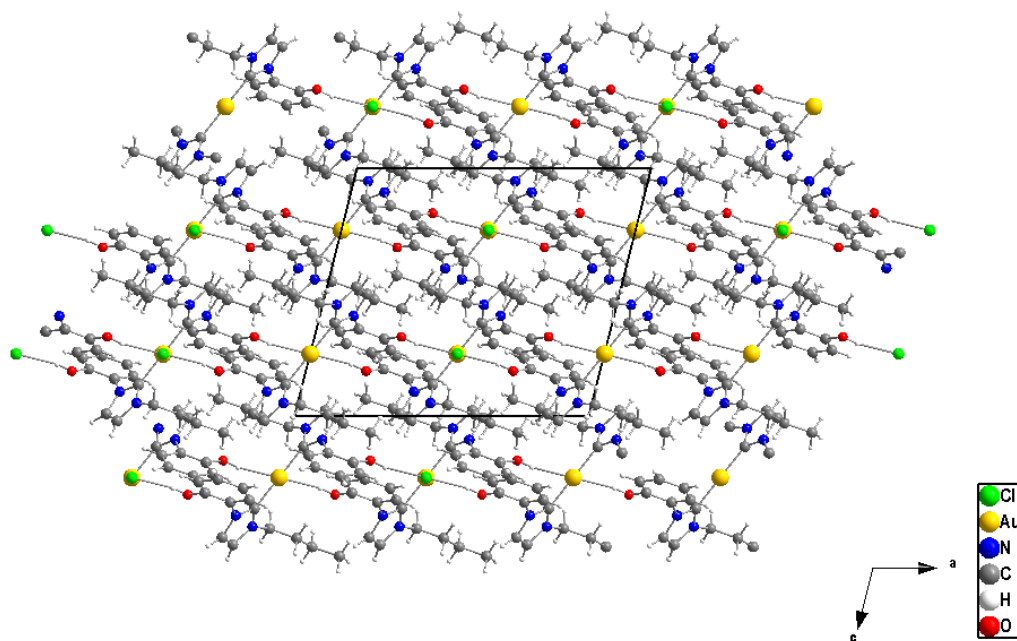

**Figure S19:** Unit cell of gold complex 9.

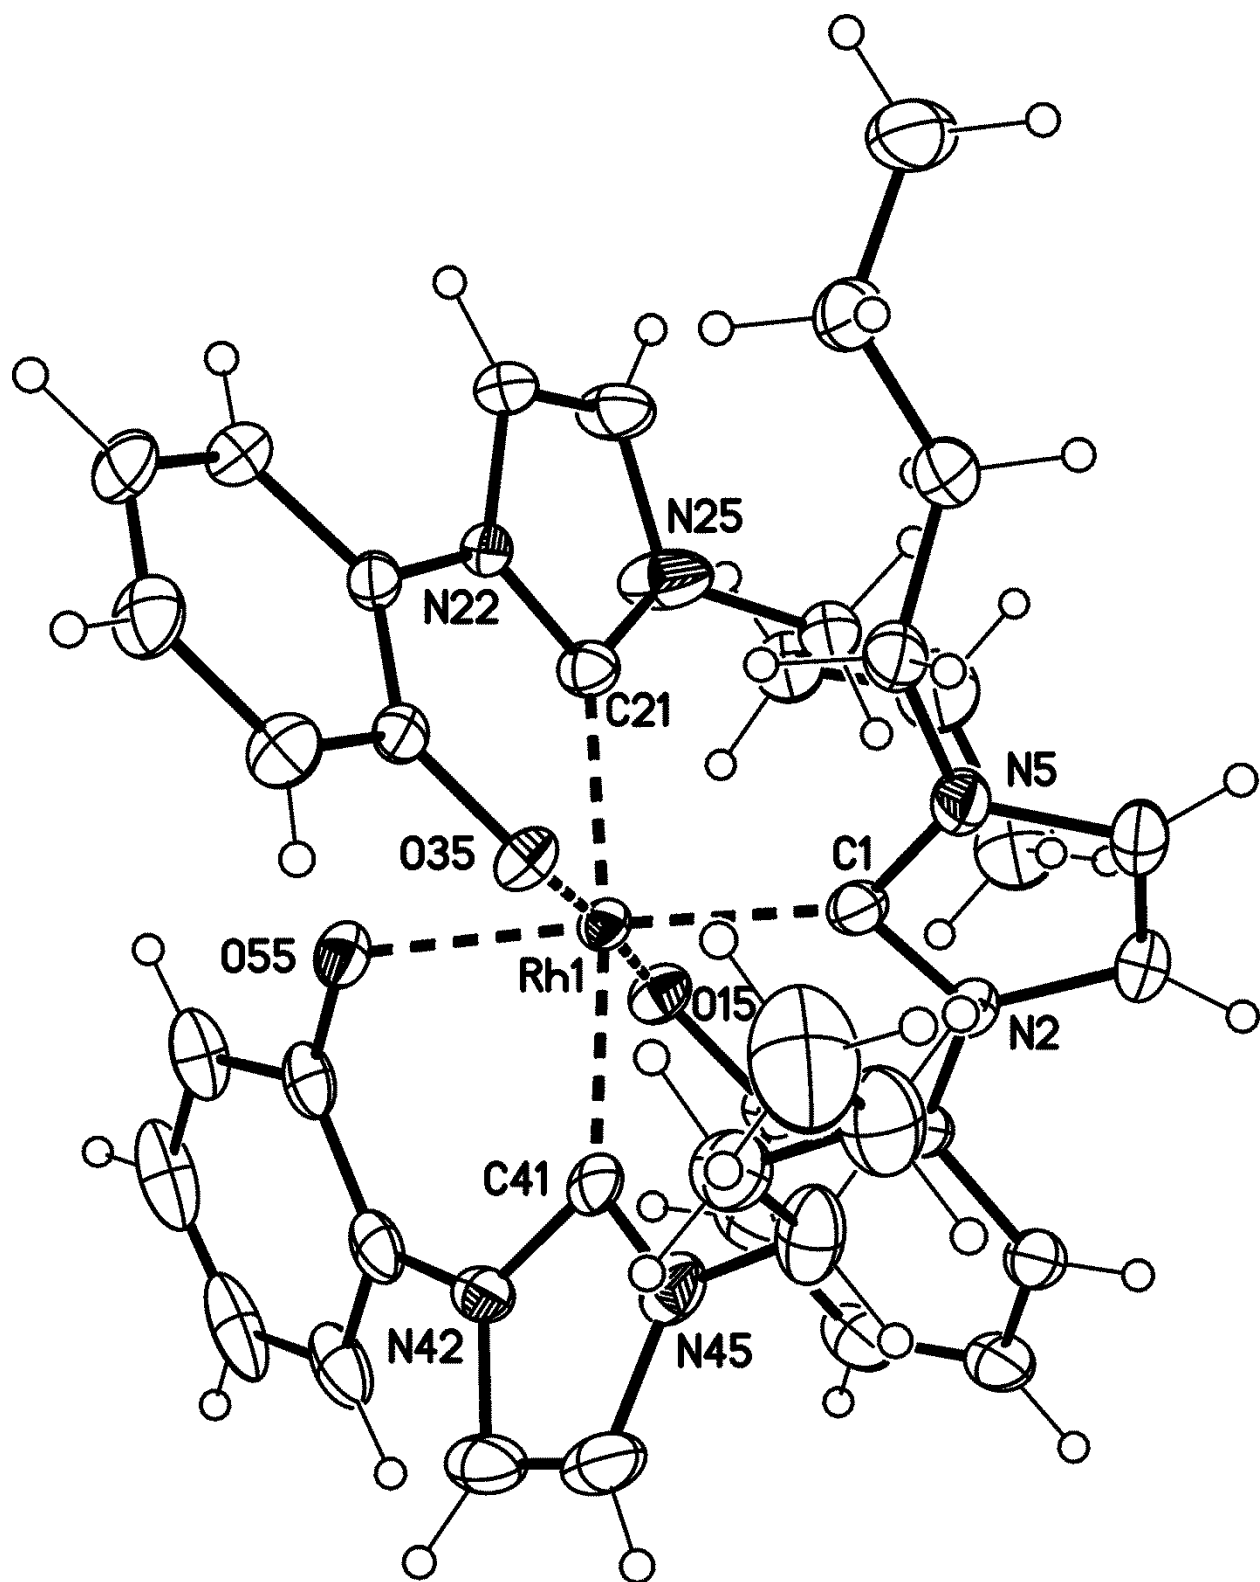

**Figure S20:** Molecular drawing of the rhodium complex **11** (minor disorder part omitted for clarity, displacement parameters are drawn at 50% probability level).

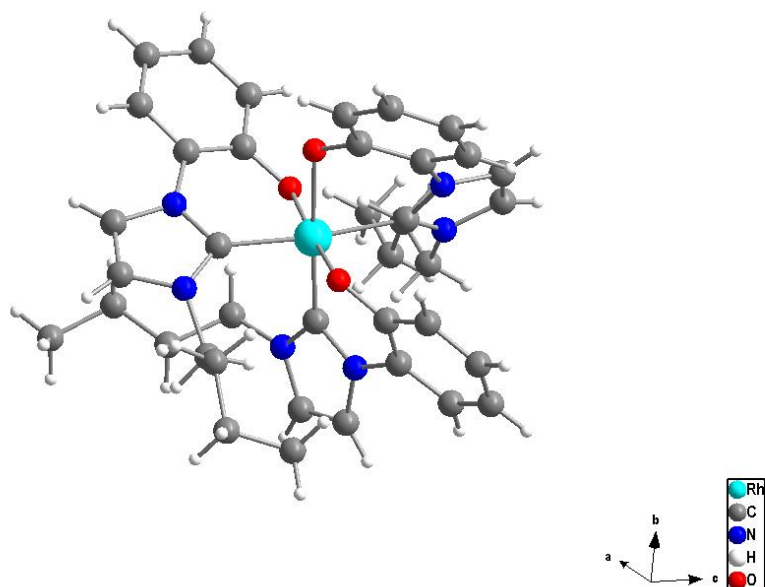

**Figure S21:** Molecular drawing of the rhodium complex **11**.

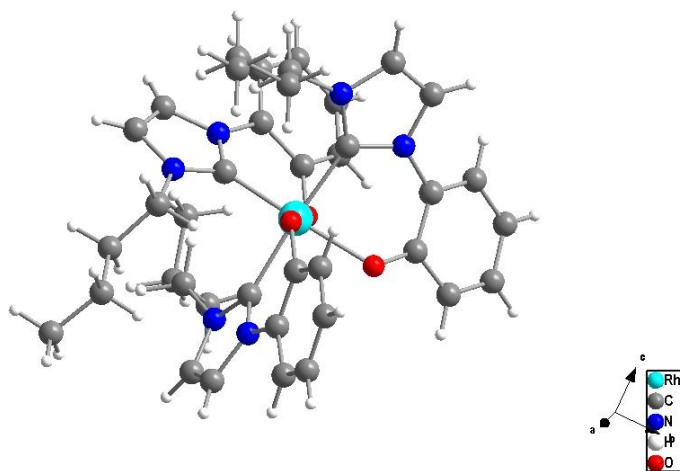

**Figure S22:** Molecular drawing of the rhodium complex **11**.

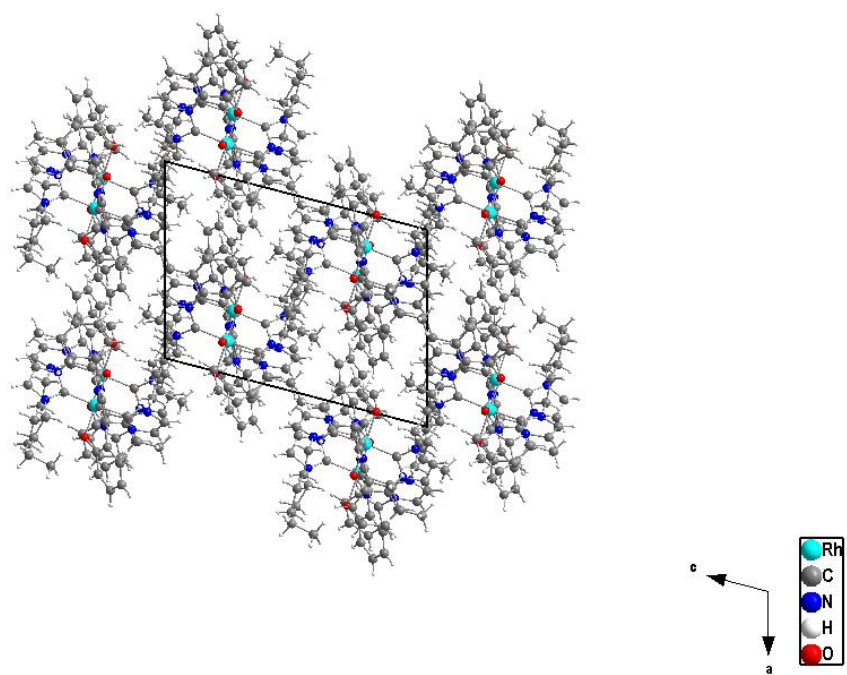

**Figure S23:** Unit cell of the rhodium complex **11**.

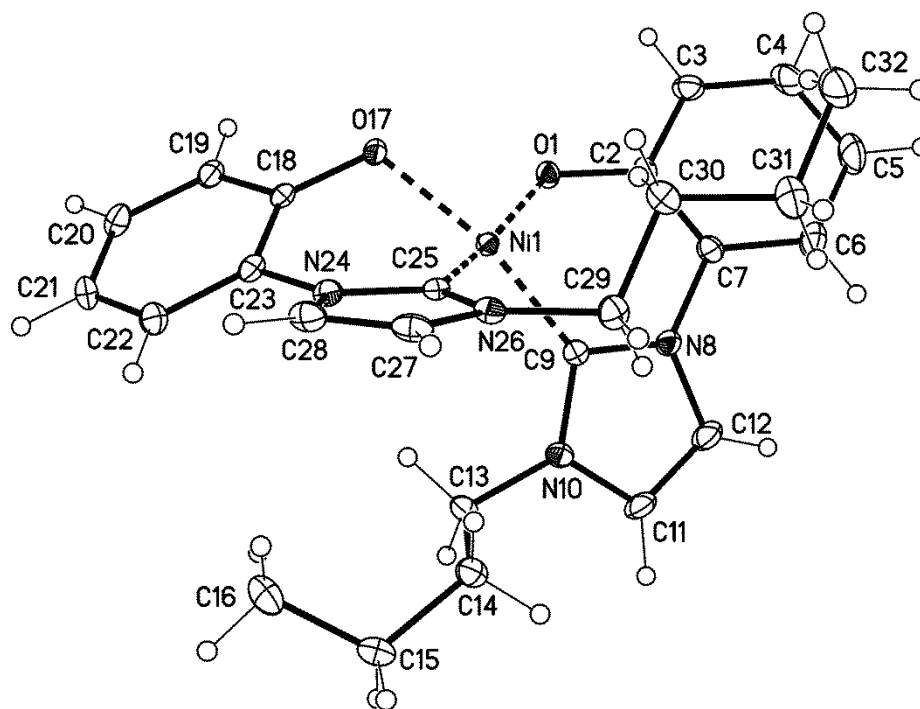

**Figure S24:** Molecular drawing of one of the crystallographic independent molecules of the nickel complex **12** (minor disorder part omitted for clarity, displacement parameters are drawn at 50% probability level).

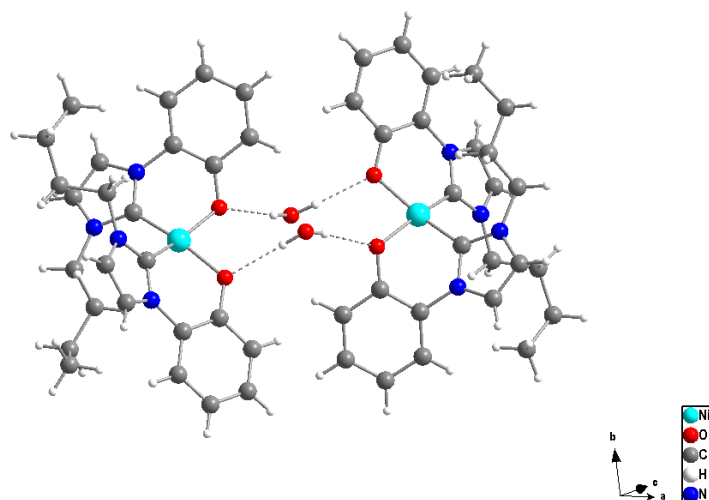

**Figure S25:** Molecular drawing of the dimeric nickel complex **12**.



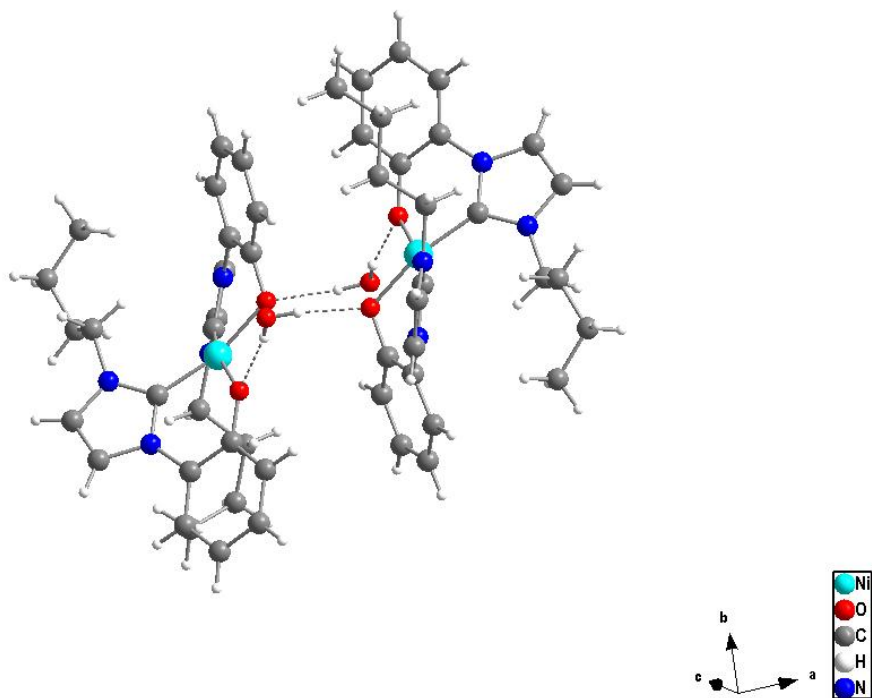

**Figure S26:** Molecular drawing of nickel complex 12.
